# Supplementary material for: Einfluss der Reihenfolge von Items auf die diagnostische Qualität von Vorsichtungsalgorithmen hinsichtlich der Vergabe der Sichtungskategorie I
Source: Springer Nature journal article supplement (doi:10.1007/s10049-020-00776-7), 2020-09-04
Supplement: MOESM1 [file 18349144]

1 **Anhang:**

2 Hier finden Sie die erstellten Variationen der Vorsichtungsalgorithmen mSTaRT, ASAV und  
 3 PRIOR. Zu Beginn ist jeweils der Originalalgorithmus dargestellt, gefolgt von den Varianten  
 4 V2-V6. Die farbliche Hinterlegung der einzelnen Abfragen dient lediglich der besseren  
 5 Anschaulichkeit des angewendeten Rotationsprinzips und stellt keinen Bezug zu den  
 6 Sichtungskategorien dar.

7

8 **Varianten mSTaRT**

| Originalalgorithmus            |      |    | mSTaRT_V2                                                                                                                                                             |      |    | mSTaRT_V3           |      |    |
|--------------------------------|------|----|-----------------------------------------------------------------------------------------------------------------------------------------------------------------------|------|----|---------------------|------|----|
| Abfragen                       |      | SK | Abfragen                                                                                                                                                              |      | SK | Abfragen            |      | SK |
| Gehend (inkl. Nachsichtung)    | ja   | 3  | Kann einfachen Befehl befolgen                                                                                                                                        | nein | 1  | Puls tastbar?       | nein | 1  |
| nein                           |      |    | <b>Zusatzmaterial zum Beitrag</b><br>Häske D., Sarangi F., Casu S. (2020) Transportverweigerung und Transportverzicht im Rettungsdienst. Notfall Rettungsmed DOI XXXX |      |    |                     |      |    |
| Tödliche Verletzung            | ja   | EX |                                                                                                                                                                       |      |    |                     |      |    |
| nein                           |      |    | Tödliche Verletzung                                                                                                                                                   | ja   | EX | Nachsichtung)       | ja   | 3  |
| Atmung vorhanden?              | nein | 1  | nein                                                                                                                                                                  |      |    | nein                |      |    |
| ja                             |      |    | Atmung vorhanden?                                                                                                                                                     | nein | 1  | Tödliche Verletzung | ja   | EX |
| AF <10 oder >30                | ja   | 1  | ja                                                                                                                                                                    |      |    | nein                |      |    |
| nein                           |      |    | AF <10 oder >30                                                                                                                                                       | ja   | 1  | Atmung vorhanden?   | nein | 1  |
| Puls tastbar?                  | nein | 1  | nein                                                                                                                                                                  |      |    | ja                  |      |    |
| ja                             |      |    | Puls tastbar?                                                                                                                                                         | nein | 1  | AF <10 oder >30     | ja   | 1  |
| Kann einfachen Befehl befolgen | nein | 1  | ja                                                                                                                                                                    |      |    | nein                |      |    |
| ja                             |      |    |                                                                                                                                                                       |      |    |                     |      |    |
|                                |      | 2  |                                                                                                                                                                       |      | 2  |                     |      | 2  |

9

10

11

12

13

14

15

16

**mStART\_V4**

| Abfragen                                |      | SK |
|-----------------------------------------|------|----|
| AF <10 oder >30<br>nein                 | ja   | 1  |
| Puls tastbar?<br>ja                     | nein | 1  |
| Kann einfachen<br>Befehl befolgen<br>ja | nein | 1  |
| Gehend (inkl.<br>Nachsichtung)<br>nein  | ja   | 3  |
| Tödliche<br>Verletzung<br>nein          | ja   | EX |
| Atmung<br>vorhanden?<br>ja              | nein | 1  |
|                                         |      | 2  |

**mStART\_V5**

| Abfragen                                |      | SK |
|-----------------------------------------|------|----|
| Atmung vorhanden?<br>ja                 | nein | 1  |
| AF <10 oder >30<br>nein                 | ja   | 1  |
| Puls tastbar?<br>ja                     | nein | 1  |
| Kann einfachen Befehl<br>befolgen<br>ja | nein | 1  |
| Gehend (inkl.<br>Nachsichtung)<br>nein  | ja   | 3  |
| Tödliche Verletzung<br>nein             | ja   | EX |
|                                         |      | 2  |

**mStART\_V6**

| Abfragen                                |      | SK |
|-----------------------------------------|------|----|
| Tödliche<br>Verletzung<br>nein          | ja   | EX |
| Atmung<br>vorhanden?<br>ja              | nein | 1  |
| AF <10 oder >30<br>nein                 | ja   | 1  |
| Puls tastbar?<br>ja                     | nein | 1  |
| Kann einfachen<br>Befehl befolgen<br>ja | nein | 1  |
| Gehend (inkl.<br>Nachsichtung)<br>nein  | ja   | 3  |
|                                         |      | 2  |

17

18 **Varianten ASAV**

**Originalalgorithmus**

| Abfragen                                |      | SK |
|-----------------------------------------|------|----|
| Gehend<br>nein                          | ja   | 3  |
| Tödliche Verletzung<br>nein             | ja   | EX |
| Atemstörung<br>nein                     | ja   | 1  |
| Spritzende Blutung<br>nein              | ja   | 1  |
| Puls tastbar?<br>ja                     | nein | 1  |
| Kann einfachen<br>Befehl befolgen<br>ja | nein | 1  |
|                                         |      | 2  |

**ASAV\_V2**

| Abfragen                                |      | SK |
|-----------------------------------------|------|----|
| Kann einfachen<br>Befehl befolgen<br>ja | nein | 1  |
| Gehend<br>nein                          | ja   | 3  |
| Tödliche Verletzung<br>nein             | ja   | EX |
| Atemstörung<br>nein                     | ja   | 1  |
| Spritzende Blutung<br>nein              | ja   | 1  |
| Puls tastbar?<br>ja                     | nein | 1  |
|                                         |      | 2  |

**ASAV\_V3**

| Abfragen                                |      | SK |
|-----------------------------------------|------|----|
| Puls tastbar?<br>ja                     | nein | 1  |
| Kann einfachen<br>Befehl befolgen<br>ja | nein | 1  |
| Gehend<br>nein                          | ja   | 3  |
| Tödliche Verletzung<br>nein             | ja   | EX |
| Atemstörung<br>nein                     | ja   | 1  |
| Spritzende Blutung<br>nein              | ja   | 1  |
|                                         |      | 2  |

19

| ASAV_V4                                 |      | SK |   |
|-----------------------------------------|------|----|---|
| Abfragen                                |      |    |   |
| Spritzende Blutung<br>nein              | ja   | 1  |   |
| Puls tastbar?<br>ja                     | nein | 1  |   |
| Kann einfachen<br>Befehl befolgen<br>ja | nein | 1  |   |
| Gehend<br>nein                          | ja   | 3  |   |
| Tödliche Verletzung<br>nein             | ja   | EX |   |
| Atemstörung<br>nein                     | ja   | 1  |   |
|                                         |      |    | 2 |

| ASAV_V5                                 |      | SK |   |
|-----------------------------------------|------|----|---|
| Abfragen                                |      |    |   |
| Atemstörung<br>nein                     | ja   | 1  |   |
| Spritzende Blutung<br>nein              | ja   | 1  |   |
| Puls tastbar?<br>ja                     | nein | 1  |   |
| Kann einfachen<br>Befehl befolgen<br>ja | nein | 1  |   |
| Gehend<br>nein                          | ja   | 3  |   |
| Tödliche Verletzung<br>nein             | ja   | EX |   |
|                                         |      |    | 2 |

| ASAV_V6                                 |      | SK |   |
|-----------------------------------------|------|----|---|
| Abfragen                                |      |    |   |
| Tödliche Verletzung<br>nein             | ja   | EX |   |
| Atemstörung<br>nein                     | ja   | 1  |   |
| Spritzende Blutung<br>nein              | ja   | 1  |   |
| Puls tastbar?<br>ja                     | nein | 1  |   |
| Kann einfachen<br>Befehl befolgen<br>ja | nein | 1  |   |
| Gehend<br>nein                          | ja   | 3  |   |
|                                         |      |    | 2 |

20

21 **Varianten PRIOR**

| Originalalgorithmus         |    | SK |   |
|-----------------------------|----|----|---|
| Abfragen                    |    |    |   |
| Bewusstlos<br>nein          | ja | 1  |   |
| Atemstörung<br>nein         | ja | 1  |   |
| Kreislaufstörung<br>nein    | ja | 1  |   |
| Bewusstseinsstörung<br>nein | ja | 1  |   |
| Starke Schmerzen<br>nein    | ja | 1  |   |
| Liegend<br>nein             | ja | 2  |   |
|                             |    |    | 3 |

| PRIOR_V2                    |    | SK |   |
|-----------------------------|----|----|---|
| Abfragen                    |    |    |   |
| Liegend<br>nein             | ja | 2  |   |
| Bewusstlos<br>nein          | ja | 1  |   |
| Atemstörung<br>nein         | ja | 1  |   |
| Kreislaufstörung<br>nein    | ja | 1  |   |
| Bewusstseinsstörung<br>nein | ja | 1  |   |
| Starke Schmerzen<br>nein    | ja | 1  |   |
|                             |    |    | 3 |

| PRIOR_V3                    |    | SK |   |
|-----------------------------|----|----|---|
| Abfragen                    |    |    |   |
| Starke Schmerzen<br>nein    | ja | 1  |   |
| Liegend<br>nein             | ja | 2  |   |
| Bewusstlos<br>nein          | ja | 1  |   |
| Atemstörung<br>nein         | ja | 1  |   |
| Kreislaufstörung<br>nein    | ja | 1  |   |
| Bewusstseinsstörung<br>nein | ja | 1  |   |
|                             |    |    | 3 |

22

23

24

25

**PRIOR\_V4**

| Abfragen                          |    | SK |
|-----------------------------------|----|----|
| Bewusstseinsstörung<br>ja<br>nein | ja | 1  |
| Starke Schmerzen<br>ja<br>nein    | ja | 1  |
| Liegend<br>ja<br>nein             | ja | 2  |
| Bewusstlos<br>ja<br>nein          | ja | 1  |
| Atemstörung<br>ja<br>nein         | ja | 1  |
| Kreislaufstörung<br>ja<br>nein    | ja | 1  |
|                                   |    | 3  |

**PRIOR\_V5**

| Abfragen                          |    | SK |
|-----------------------------------|----|----|
| Kreislaufstörung<br>ja<br>nein    | ja | 1  |
| Bewusstseinsstörung<br>ja<br>nein | ja | 1  |
| Starke Schmerzen<br>ja<br>nein    | ja | 1  |
| Liegend<br>ja<br>nein             | ja | 2  |
| Bewusstlos<br>ja<br>nein          | ja | 1  |
| Atemstörung<br>ja<br>nein         | ja | 1  |
|                                   |    | 3  |

**PRIOR\_V6**

| Abfragen                          |    | SK |
|-----------------------------------|----|----|
| Atemstörung<br>ja<br>nein         | ja | 1  |
| Kreislaufstörung<br>ja<br>nein    | ja | 1  |
| Bewusstseinsstörung<br>ja<br>nein | ja | 1  |
| Starke Schmerzen<br>ja<br>nein    | ja | 1  |
| Liegend<br>ja<br>nein             | ja | 2  |
| Bewusstlos<br>ja<br>nein          | ja | 1  |
|                                   |    | 3  |

26

27
